# Supplementary material for: Reparameterization of PAM50 Expression Identifies Novel Breast Tumor Dimensions and Leads to Discovery of a Genome-Wide Significant Breast Cancer Locus at 12q15
Source: Oxford University Press journal article supplement (doi:10.1158/1055-9965.epi-17-0887), 2018-04-12
Supplement: 10559965epi170887-sup-190150_3_supp_4597113_p4tvrg.xlsx [file 10559965epi170887-sup-190150_3_supp_4597113_p4tvrg.xlsx]

## Sheet: Supplemental Table 1
	PC1	PC2	PC3	PC4	PC5
Eigenvalues (variance)	40.4616	25.1278	13.509	7.05866	4.20683
%Cumul. Variance	0.304618	0.189176	0.101703	0.0531416	0.0316714
KRT14	-0.0234549	0.393	0.352577	0.060329	0.00217599
PGR	-0.281097	-0.0954353	0.334998	-0.192277	-0.278111
KRT5	0.0527894	0.394395	0.306153	0.10786	-0.0517647
NAT1	-0.234156	-0.118912	0.295931	-0.0573064	-0.0443911
ESR1	-0.251434	-0.185803	0.248722	-0.129166	0.0375014
KRT17	0.0887505	0.366463	0.246889	0.181632	-0.239103
SLC39A6	-0.116104	-0.101471	0.216594	-0.0663076	0.132957
MIA	0.0985659	0.236788	0.178086	-0.111504	0.192415
MLPH	-0.198551	-0.104491	0.169354	0.123853	0.224479
MAPT	-0.175163	-0.0927807	0.162538	-0.0844512	-0.120019
FOXA1	-0.218607	-0.188777	0.151811	0.243742	0.063924
CDCA1	0.150137	-0.111543	0.15058	-0.0239068	-0.0264976
BCL2	-0.0945096	-0.0287043	0.150485	-0.0457387	0.177309
BIRC5	0.194323	-0.146545	0.138932	-0.000186317	0.0306397
CXXC5	-0.053637	-0.0892563	0.137273	0.016442	0.0826637
CEP55	0.181619	-0.118954	0.129221	-0.00052838	-0.0398534
MKI67	0.158926	-0.106503	0.122752	-0.0180658	-0.0555957
EXO1	0.202468	-0.150715	0.114191	0.0118308	0.0671095
UBE2C	0.12465	-0.110202	0.111078	-0.0191652	0.0298144
CCNB1	0.123389	-0.0932136	0.105464	0.0156258	-0.0359898
CDC20	0.19501	-0.0990544	0.104559	-0.00505556	0.00221083
RRM2	0.180142	-0.133712	0.0978175	0.013999	-0.0383117
CDC6	0.157874	-0.139207	0.0975902	0.077354	0.12658
UBE2T	0.098204	-0.0732431	0.0963059	0.0308767	0.0093798
CENPF	0.0709986	-0.0268472	0.0909722	0.0174832	0.0525923
KNTC2	0.16785	-0.0913991	0.0903026	-0.0443802	-0.0690361
BAG1	-0.0240771	-0.015391	0.0893111	0.0117826	0.0328634
KIF2C	0.168153	-0.0867099	0.0882505	0.0214277	0.0354659
CDH3	0.1146	0.144881	0.0801386	0.143148	-0.14308
ANLN	0.134136	-0.0562621	0.0793492	0.0290852	-0.0699864
GPR160	-0.0852343	-0.0755609	0.0781796	0.156379	0.0929413
TYMS	0.123775	-0.0691448	0.0774313	-0.0648677	-0.055446
BLVRA	-0.0189334	-0.0434596	0.0763317	0.0703846	0.016045
MYBL2	0.232279	-0.125572	0.0742183	0.0209924	-0.086147
PTTG1	0.123723	-0.0849164	0.0730605	-0.018321	0.0198825
MDM2	-0.0249286	-0.0191651	0.0675885	0.0141371	0.106628
SFRP1	0.0332206	0.269348	0.0673794	-0.113706	0.259968
MELK	0.175371	-0.0643327	0.0594316	-0.0194725	-0.0804883
ORC6L	0.180683	-0.0569211	0.0583058	0.0231302	-0.00745941
FOXC1	0.0976903	0.109533	0.0575815	-0.0636857	0.223996
TMEM45B	-0.146222	-0.042023	-0.0487568	0.583715	-0.14039
ACTR3B	-0.0132359	-0.00630153	0.0331769	-0.0302127	0.0416436
MYC	0.0401169	0.0178638	0.0253937	-0.12378	0.12957
ERBB2	-0.00260164	-0.0561101	0.0215595	0.342351	0.087089
PHGDH	0.130246	0.0629643	-0.0188108	0.00312685	-0.0542277
FGFR4	0.0301243	-0.0457822	0.0152258	0.211558	0.315907
MMP11	-0.00825658	-0.0639274	0.0136765	0.129341	-0.43083
GRB7	0.0522003	-0.0671075	0.0133204	0.350578	0.15203
CCNE1	0.16985	-0.0222937	0.000784142	0.0220148	-0.048944
EGFR	0.0342064	0.103542	-0.000163081	0.159506	0.114995
The signs as given reflect those used in the manuscript and are echoed in the cell colors.
Signs within a dimension are meaningful; signs across PCs are not.
Genes are ordered by the absolute coefficients in novel dimension PC3
Genes mentioned in the main text are bold and colored: ER signaling genes PGR, ESR1, NAT1 and FOXA1 are colored green; basal cytokeratins KRT5, KRT14 and KRT17 are colored red; ERBB2 is colored purple; and growth factor genes EGFR, FGFR4 and GRB7 are colored brown.
